# Supplementary material for: A Three-Year Longitudinal Study Comparing Bone Mass, Density, and Geometry Measured by DXA, pQCT, and Bone Turnover Markers in Children with PKU Taking L-Amino Acid or Glycomacropeptide Protein Substitutes
Source: MDPI journal article supplement (doi:10.3390/nu13062075), 2021-06-17
Supplement: s1 [file s1]

**Supplementary Table S1. Differentiation of median DXA z scores (range): lumbar vertebrae L2-L4 areal bone mineral density (L2-L4 aBMD); lumbar vertebrae L2-L4 bone mineral apparent density (L2-L4 BMAD) and total body less head areal bone mineral density (TBLH BMDa) by gender. Median value (range) for total body bone mineral content (BMC) by gender.**

|                                              |        | Female               |                      | Male                 |                      |
|----------------------------------------------|--------|----------------------|----------------------|----------------------|----------------------|
| Z score                                      |        | Enrolment            | 36 months            | Enrolment            | 36 months            |
| L2-L4 BMDa g/cm <sup>2</sup>                 | L-AA   | 0.05<br>(-0.5, 0.2)  | -0.4<br>(-0.6, -0.1) | -0.2<br>(-0.9, 0.35) | -0.7<br>(-1.2, 0.1)  |
|                                              | GMP100 | 0.3<br>(-0.5, 0.9)   | 0.1<br>(-0.7, 1.0)   | -0.7<br>(-0.9, 0.1)  | -0.9<br>(-0.9, 0.4)  |
|                                              | GMP50  | 0.1<br>(-0.6, 0.4)   | 0.1<br>(-0.4, 0.4)   | -0.2<br>(-0.4, 0.1)  | -0.2<br>(-0.7, -0.1) |
| L2-L4 BMAD g/cm <sup>3</sup>                 | L-AA   | -0.05<br>(-0.4, 0.5) | -0.5<br>(-0.8, -0.1) | -0.4<br>(-0.8, 0.3)  | -0.9<br>(-1.4, -0.1) |
|                                              | GMP100 | 0.4<br>(-0.1, 0.7)   | 0<br>(-0.4, 0.6)     | -0.4<br>(-1, 0.2)    | 0.2<br>(-0.5, 0.4)   |
|                                              | GMP50  | 0.15<br>(-0.7, 1.3)  | -0.3<br>(-0.5, 0.4)  | -0.2<br>(-0.5, -0.1) | -0.2<br>(-0.2, -0.1) |
| TBLH BMDa g/cm <sup>2</sup>                  | L-AA   | 0<br>(-0.3, 0.1)     | -0.2<br>(-0.3, 0.)   | -0.3<br>(-0.6, -0.1) | -0.2<br>(-0.4, -0.1) |
|                                              | GMP100 | -1<br>(-1.3, -0.7)   | -0.4<br>(-0.7, -0.2) | -0.6<br>(-0.7, -0.3) | -0.4<br>(-0.7, -0.3) |
|                                              | GMP50  | -1.1<br>(-1.6, -0.6) | -0.7<br>(-0.9, -0.5) | -0.7<br>(-0.9, -0.1) | -0.6<br>(-0.9, -0.1) |
| <b>Median values (range) for Total BMC g</b> |        |                      |                      |                      |                      |
|                                              |        | Enrolment            | 36 months            | Enrolment            | 36 months            |
| Total body BMC g                             | L-AA   | 1266<br>(608, 1610)  | 1690<br>(990, 1779)  | 984<br>(761, 1454)   | 1472<br>(1192, 1817) |
|                                              | GMP100 | 759<br>(666, 847)    | 1287<br>(1103, 1476) | 887<br>(704, 1210)   | 1405<br>(1167, 1871) |
|                                              | GMP50  | 578<br>(528, 646)    | 1009<br>(956, 1113)  | 675<br>(567, 733)    | 1023<br>(1010, 1186) |

Legend: L2-L4 BMDa; L2-L4 lumbar spine vertebrae areal bone mineral density; L2-L4 BMAD; L2-L4 lumbar spine vertebrae bone mineral apparent density; TBLH, BMDa total body less head areal bone mineral density; BMC total body bone mineral content, DXA, dual-energy x-ray absorptiometry; L-AA, amino acids; CGMP, casein glycomacropeptide; CGMP100, children taking all their protein substitute as casein glycomacropeptide; CGMP50, children taking a combination of casein glycomacropeptide and amino acids.

Statistical significance (p value <0.05) was not reported for any parameter

**Supplementary Table S2. Differentiation of peripheral quantitative computerised tomography(pQCT) z scores (range) by gender at 36 months**

| <b>Z scores</b>                 | <b>Treatment</b> | <b>Female z score<br/>(range)</b> | <b>Male z score<br/>(range)</b> |
|---------------------------------|------------------|-----------------------------------|---------------------------------|
| Trabecular density 4%           | L-AA             | -0.4<br>(-0.9, 0)                 | -0.6<br>(-1.4, -0.1)            |
|                                 | GMP100           | -1.0<br>(-1.2, 0.9)               | -0.6<br>(-1.5, -0.2)            |
|                                 | GMP50            | -1.0<br>(-1.4, 0.9)               | -1.0<br>(-1.2, -0.3)            |
| Total.density 4%                | L-AA             | -0.1<br>(-0.5, 0.8)               | -0.7<br>(-0.9, 0.3)             |
|                                 | GMP100           | -1.1<br>(-1.2, -0.9)              | -0.7<br>(-0.8, -0.3)            |
|                                 | GMP50            | -0.8<br>(-1, -0.6)                | -0.5<br>(-0.8, 0.2)             |
| SSI<br>(Strength, strain index) | L-AA             | 0.5<br>(-0.2, 1.3)                | 0.2<br>(-0.4, 0.6)              |
|                                 | GMP100           | -1.0<br>(-1.3, -0.3)              | 0.1<br>(-1.1, 1)                |
|                                 | GMP50            | 0<br>(-0.2, 0.3)                  | -0.7<br>(-1.3, 1.2)             |
| Cortical density 66%            | L-AA             | -0.4<br>(-1.1, 0.3)               | -0.2<br>(-0.9, 0.5)             |
|                                 | GMP100           | 0.2<br>(0.1, 0.2)                 | 0.1<br>(-0.3, 0.7)              |
|                                 | GMP50            | -0.4<br>(-1.4, 0.1)               | -0.5<br>(-0.7, -0.1)            |
| Muscle area 66%                 | L-AA             | -1.7<br>(-2.2, -0.8)              | -0.8<br>(-1.3, -0.5)            |
|                                 | GMP100           | -1.7<br>(-1.8, -1.6)              | -0.7<br>(-0.8, -0.1)            |
|                                 | GMP50            | -1.2<br>(-1.4, -0.6)              | -0.9<br>(-1.4, -0.5)            |
| Bone area 66%                   | L-AA             | 2.5<br>(1.7, 2.8)                 | 1.8<br>(1.5, 3.9)               |
|                                 | GMP100           | 1.6<br>(1.4, 2.3)                 | 3.7<br>(1.4, 4.2)               |
|                                 | GMP50            | 1.5<br>(0.9, 2)                   | 0.5<br>(0.1, 1.3)               |
| Fat area 66 %                   | L-AA             | 1.3<br>(0.7, 2.1)                 | 0.5<br>(0.1, 2.4)               |
|                                 | GMP100           | 0.9<br>(0.7, 1.0)                 | -0.2<br>(-0.7, 0.7)             |
|                                 | GMP50            | 1.6<br>(0.7, 1.8)                 | 0.5<br>(-0.2, 1.0)              |
| Bone area/muscle area 66%       | L-AA             | 1.2<br>(0.5, 1.9)                 | 0.2<br>(0.2, 1.1)               |

|  |        |                    |                      |
|--|--------|--------------------|----------------------|
|  | GMP100 | 0.5<br>(0.2, 1.0)  | 0.3<br>(-0.3, 1.1)   |
|  | GMP50  | 0.4<br>(-0.9, 0.6) | -0.5<br>(-1.4, -0.1) |

Legend: L-AA, amino acids; CGMP, casein glycomacropeptide; CGMP100, children taking all their protein substitute as casein glycomacropeptide; CGMP50, children taking a combination of casein glycomacropeptide and amino acids; pQCT, peripheral quantitative computerised tomography.

Statistical significance (p value <0.05) was not reported for any parameter
